# Supplementary material
Source: PubMed Central journal article supplement (PMC4466455)
Supplement: ijbsv11p0737s1.pdf [file ijbsv11p0737s1.pdf]

## Supplementary Material

**Table S1** Primers used for RACE-PCR.

| Genes       | 5'RACE (5'-3')                    | 3'RACE (5'-3')                    |
|-------------|-----------------------------------|-----------------------------------|
| MmedOR14    | CCGTCGCACAAACGCCAGTAGTTAATGT      | CAACAGCGACTGGAATCGTCTTGCAAG       |
| MmedOR15    | GGACGACTATCAGAGCGAGCATTGTGA       | TATTGTGTTACATGTGCGGGCACATTAC      |
| MmedOR16    | CTCGTCTAATGCCGATCCAAGTTGCTGT      | CGTGACGGTAGTTATGACCAAGATCGGA      |
| MmedOR17    | CAATAACGGCCAAACGCCACTGTACCT       | GCCTATACGAGCTATTTACCCATTGACACA    |
| MmedOR18    | CTTGTAGGACAACGAAGCTCCCTGGAA       | GTCTGTTTGTGCGGCTAATTCAGACATTGG    |
| MmedOR19    | TCCACATCGTTTAGTAGCAATGTCCAATCACG  | CGTACACTACAACATCATGCGAACCTCGGT    |
| MmedOR20    | AGCAAGATAACATCCGTCATCAGTGGCA      | TGTTGATGGACGGAATGGGTTTAGGAAT      |
| MmedOR21    | TCGGCAATACGGACTCGACAGATAGTCCA     | TGGGGGAATTTGGATATGATTATTGAGTGC    |
| MmedOR22    | GAAGAAGCTTTCGCGATCTCATAGACGTC     | CACGGATCAGTGAAACCACAACCAGATG      |
| MmedOR23    | ACGAGAGGTCCAAAATTACTCCAACACTTGC   | TCAGAGCCTCCCAACTGAGGCCAAGTATC     |
| MmedOR24    | TAAGGTTCCAATACCGGTGGCCAAGTTC      | CTTCCGGTCATCAAGCTGTTGCAATTCT      |
| MmedOR25    | TGGAATTGAGAGGCAATGTAGTGTGCGAGC    | GAACTGGTCTATGCCCACCAAAGTGCTGC     |
| MmedOR26    | TTGCACAAAGGTGATGTACATGATGTACATG   | GACATCATGTACATCACCTTTGTGCAACAG    |
| MmedOR27    | TCGGTGACCTGTAATTGCAAACAATCCACAG   | GTCACCGAATTGAAAATTTGCCACACGAC     |
| MmedOR28    | CAATACTCTGGCCATTTTGAGCAATCGG      | AGTCAACGATTCAAGAATGAGGCACTGACG    |
| MmedOR29    | GAGTGATAAAGGAACAACCCCAATTGCTCG    | AACTGAGCGCTGCAGCGGATTCATTG        |
| MmedOR30    | GAACTCCGCTGGAATTTGCGGTTAGTATGC    | AACTCCTCTACCTGCATCAAAGCTGTGCGAC   |
| MmedOR31    | TCTGCTGCTCTGGTACGCTGGTGTGCGAG     | TCGCGACGATTCAATTGTATGTCTATAACCAG  |
| MmedOR32    | CAGATACCATTCTGCAAAGTATGCAGATTCCG  | ATGCTGATAATGATAAGATCAAGTAAGCCAGC  |
| MmedOR33    | CTCCATGTGTGACAACAAGTACGCAATCGTAC  | ACTTGTGTGACACATGGAGCCTACGACG      |
| MmedOR34    | TTATACCATCCGCAATTCCAATATGCCTCG    | CTTCTATGCATGATTGGCTATCAGATACTCGTC |
| MmedOR35    | ACCATTTGAGATAGAGCGTAAACGCTGCTGC   | TTCTGTAGTTCTCTGCAGCAGCGTTTACGC    |
| MmedOR36    | CGAAGGCTAGATTAATGGATGCCGCACTG     | ACAACAACAGGCGTCTACTGGTTGACAGCA    |
| MmedOR37    | AAGTTGTCAACGAATGCGTCAAGGTGCGAC    | CGACCTTGACGCATTCGTTGACAACCTG      |
| MmedOR38    | TGAAGCACCTGTGACAGCAAATACTGCACC    | TGTGGTGCAGTATTTGCTGTACAGGTGC      |
| MmedOR39    | CAAGGTATTGCGTCTCTTAGTAGTAATGGCACC | CAAGCGAACTGGAATAATACATCAACACGTTT  |
| MmedOR40    | ACCGTAATTGACCACAAATGTGAAGCACC     | TCAATTAGCGGTGCTTGGCATATCATTGC     |
| MmedOR41    | GCTGACAACGTGCACAATGACGAAAGTCCG    | ATTCCACGTATCTGCGATCCATCCACCG      |
| MmedOR42    | TCGTAAGCTAAATTAACCCATGCACCACTGC   | GTATGCGGGCTGTTACTGTAGCGGTATC      |
| MmedOR43    | TGCAGGCAGTCAAAGTTAGTGGTCTCTGTGC   | CATTCATGTACGCATGGAGCGGATCG        |
| MmedOR44    | CAACTGCCGAATGTCCGATTCCACTGAC      | TATGCGCGTATTCTGATGCTTCGTGTGC      |
| MmedOR45    | GCTTAATCCGACCACAATAACGCCAAGTAGC   | CATGCCTGCAGCATGTTCACTATCATCG      |
| MmedOR46    | TTGCTTCGGGTGTCGTCAAGCAAATGAG      | GCTAGAATAATGATGGTCTGCGGGTTGTGC    |
| MmedOR47    | AAGAAGCATTACGTACGTTGTCATCCCTCCAG  | ACGGTATTAATTACACACGCATGTGGACAGC   |
| MmedOR48    | CACTAACGTGATAGTCCTTCAATGCTTCGGAC  | CCGAAGCATTGAAGACTATCACGTTAGTGC    |
| MmedOR49    | TCTCTTGGCTAAAATCGCGAGCCTACCG      | TTATGCTCTCGTTTCATGTCACCGGTAGGC    |
| MmedOR50    | AACATACTGCAAACATGGTGGCCGCAAG      | CACGGCTACATGGCATTGCCAATTACG       |
| MmedOR51    | CTCTTGACACTCCACACCACTCCGATCAG     | CAAACCTGATCGGAGTGGTGTGGAGTGTCA    |
| MmedOR52    | ACCAATGACTGCTAGTTGGCCACAAATATGG   | TATGGTGTCCATATTTGTGGCCAACTAGC     |
| MmedOR53    | AAGTGTATAGAATGGACTTCCGTCCGTGCC    | TATGGAAGCCAGCAACTTGGCACGGAC       |
| MmedGR64f   | ACATTCGGAGCGCTTATGTATCCGGAGG      | CCTGTCACTTGCCTCCGGATACATAAGCG     |
| MmedGR6     | CATAAATGACACGTTGTGACGCCAGGGTTC    | GGCAGTGGTCAAGTTCTTACAGGAATGAATGC  |
| MmedIR8a    | CCAAATCATAATTGCTGTCGCTACTATCGCC   | GTCGAAAGAATGCAAGTGCCCGTACAATC     |
| MmedIR25a.1 | AACTGTACGGTGACCAACGATCAAATATCCAC  | CGATTAGTTGCTGCTACCTGGTGGCTATTTGG  |
| MmedIR25a.2 | GTTGTAACCGGGAGACTGTCAAATAAGCTGC   | CTACTCGAGGGTGAATTTTCACGGAAGCCA    |
| MmedIR64a   | GGGCTGCTTCATAACCAGCTTGTGTTCG      | AGTGACGGGCCACGATTTTATGCAGGAC      |
| MmedIR75u   | ATCACACCGATGGCGTACCAAACGGTG       | TGATTACATGGGTGACTGGACCCGATGC      |
| MmedIR76b   | TATGAATGCCACTGCCACATCTGCTTTCG     | TGTGTTGTGCCACTCTTGACCTGTTG        |

**Table S2** Primers used for RT-PCR and qPCR.

| Genes       | Forward (5'-3')        | Reverse (5'-3')       | Forward (5'-3')       | Reverse (5'-3')        |
|-------------|------------------------|-----------------------|-----------------------|------------------------|
|             | <b>RT-PCR</b>          |                       | <b>qRT-PCR</b>        |                        |
| MmedOR14    | TCGCTACCTAACTGTTGGA    | CGCACAACGCCAGTAGTTA   | TGCGTCTTTGTATGAACGGA  | TCCAACAGTTAGGGTAGCGA   |
| MmedOR15    | GCTCTGATAGTCGTCCTCA    | TATTCAACCCACTCAGCCGT  | CCATTTCAAGGCTGGTTTCC  | AAGGCAGAACAGGTCTAGT    |
| MmedOR16    | GATGCAGTGTACCCGTTTCC   | TTTGACATTGCGGTGCTTGA  | GATGCAGTGTACCCGTTTCC  | AATCCAAAGCCATTCCAGCC   |
| MmedOR17    | CAGGTGGTCGACATTGCAAA   | TGACAACCGCAAGTAACGTG  | CTGGGTGGGAGTGTGCATAT  | TGACAACCGCAAGTAACGTG   |
| MmedOR18    | TGTGCAGCTGGTAATCAAGTG  | CGAGCCTACTGTCATACCGT  | AGACACGGTATGACAGTAGGC | ATCGGACACACGGTAGTATCC  |
| MmedOR19    | GCGAGCTCTAGAAATATGCGG  | TAGCAGCTGTCAACTTGCAG  | TCCCAACGGTTAGCAGACAT  | TAGCAGCTGTCAACTTGCAG   |
| MmedOR20    | TACCAATCCACCGTCACCA    | CCCATTCCGTCCATCAACAC  | ACCATTGACGAACGAAACGC  | CCAGAACGGCTTAAAAACCA   |
| MmedOR21    | ATGGTTGTACAATGCGCAGT   | ACTTCCAGCTCGATACCAGT  | GGGACTAGACTACGCTGAT   | TCTAATGGCTTCAGTGGGCT   |
| MmedOR22    | CTTGCGCAATTTTCGCTGTT   | CGCATCTGGTTGTGTTTCA   | TTTATGCTGGGTCCACTGGT  | CGACGTGAAAAAGTACTGGC   |
| MmedOR23    | GCCAATGTGCGGTGAAAATG   | CCGATTGAGGAGCAGAGGAT  | CTCCCAACTGAGGCCAAGTA  | CCGATTGAGGAGCAGAGGAT   |
| MmedOR24    | GAACCTGGCCACCGGTATTG   | GCCTTGTGTTTCTGCAACT   | TGCTGTCTATGTTGGGGCT   | ACAGCTTGATGACCGGAAGT   |
| MmedOR25    | CAATGCCAGAGAAGACGAGC   | TCGAGCCAAAAGTTCAAGGC  | AAGCCCTGCATTTGAACTGG  | GCGCCAGAATACCAGAGAAG   |
| MmedOR26    | TGGGCAGGATTCGCGTATAT   | CCCCAGCTTTGTGCTTTTCC  | AAGTGTACCCGGATTCCAGA  | CTCATGTCTGTCAACCGCTG   |
| MmedOR27    | ATGCTGTGGATTGTTTGCA    | TCTGAGCTCCGGTGAACATT  | GGATGACGTGACAGCAGAAA  | CTCATGTCCGTCAGCTGTTG   |
| MmedOR28    | CCGTCAACTTGGTGAGGTTG   | TACGTCAGTGCCATGTTCT   | AATGAAAAACGCGACGATGT  | CTGTTTACCGAACCCACTG    |
| MmedOR29    | GCGAGTCTTGGTGCTGATT    | ACCATCGCTATCCTCGTGTT  | GCAGCGGATTCATTGACGAT  | CAACCCCAATTGCTCGAAGT   |
| MmedOR30    | GCATCAAAGCTGTGCGACTA   | ATGGGACCTTGAAAGCCACT  | CCCAGCCATTTCCGAACATC  | CACAGCAGCATCGCAATTTG   |
| MmedOR31    | GCTGGTGCAGACTTGAATT    | CAGTATAACGCGGCTCCAAC  | GCTGGTGCAGACTTGAATT   | ACCGTCTGTCTAGAAATGTG   |
| MmedOR32    | TCACCTGGTTACGAAATGCT   | TTACCGTCTTCCAGTCCAC   | GTGGACTGGGAAGACGGTAA  | GTTCTTTCAAGCGCTCACCA   |
| MmedOR33    | TCGACAACCTGGCATTGGTC   | TATTTGGTAGACGGCCGTGA  | GGTGGCACGGAATAAAAGCA  | GACCAATGCCAAGTTGTGCA   |
| MmedOR34    | CCCTCGCTCCAGTTGATAA    | CCGTAGCAAAAAGCACCTCGA | CCATGGACCGCATGTTGTC   | TGATTGCTCAGCCAAAACC    |
| MmedOR35    | AGTCCATTTAGTCCGCGTGA   | GCATCATCATCCCGGAAAC   | GTGTTACCCCTGCAGAGCTTG | GCATCATCATCCCGGAAAC    |
| MmedOR36    | ATTCTGACAATGAGCCGCG    | TAGAGAGCGGTGGTATGTC   | ATTTGTACATGTGCGCTCA   | GTCAACCCACTCTCCCATCA   |
| MmedOR37    | ACATCTCGACTCACTTGCT    | ATGGCAGCAACAGGCTTAGT  | CGTTGACAACCTGGCCTTGA  | AGCAAGTGAGTCGAGGATGT   |
| MmedOR38    | TGGCTTTCATGAGTCCAGAGT  | GATGGAGAAGATTGTACGCCG | GGAGGTTTGGTATGTGGTGC  | AATCCGGTGTGTTGTCATG    |
| MmedOR39    | TCATCAAGCCTCAACCGGAA   | GGCGCCAGTGTACCATAAAG  | TCGACACGATGCTTATGTTT  | GGAGGTATGACGGTCGATGT   |
| MmedOR40    | CCGAGCTATTTCCGTGACATC  | AATGATATGCCAACGACCGC  | GATCGCTCAATTGGTCGCAA  | AATGATATGCCAACGACCGC   |
| MmedOR41    | AGCGCAGTTTTAATGGGACC   | GTCAGCACAATCAGCCGAAT  | TGACTTGGGCTGCCGATAA   | CGTTATCGGCTTCACTGCTC   |
| MmedOR42    | GTATGCGGGGCTGTTACTG    | TCGCCGATCATTTCCGTTTC  | GAACGGAAAAATGATCGGCGA | ACTGCACAAAATATGGCCGTG  |
| MmedOR43    | TGAGATGTCGCGAAATACTTGA | TAGTGGTCTCTGTGCAAGCA  | TGGAGCGGATCGTGTTTAAC  | TAGTGGTCTCTGTGCAAGCA   |
| MmedOR44    | GGTGAAATGATAACGACAGGCA | CAACTGCCGAATGTCCGATT  | ATGACGGGTCTTAATTCGGA  | GCTTCGAAAACCTTGTGTTGCT |
| MmedOR45    | GCTTTGACAGTTCTCGTGGG   | ATCGCGTACCAAAGACATCG  | GCTTTGACAGTTCTCGTGGG  | CAGTCAAATTTCCAGGCGC    |
| MmedOR46    | GGGTGTGCTCATTGCTTGA    | GAATCCGAACAAAACGCTGC  | TCCTCTCGGCTCTTATCAG   | CGGTTCGAGCCAATCACTTT   |
| MmedOR47    | AATATGCTCGCTTGGTCTGT   | ATTTCCAGCTGTCCACATGC  | GTGCTGCTTATGTACGGC    | GCAAAATGTTCTGCTCAGTCGG |
| MmedOR48    | TTGGCCAGACGAATCAATGC   | ACTCGCAACTGTAGAAGGCT  | CGTTCCTTATGTCAGCGTT   | GCATTGATTCGCTGGCCAA    |
| MmedOR49    | GCTCGCGATTTAGCCAAGA    | GCTCCAAAACGCTTCCGTAA  | TTACATGCTCCCTTCGCTA   | CTAAAATCGCGAGCCTACCG   |
| MmedOR50    | GGCCACCATGTTGACAGTAT   | TGGGTCAATTGTCCGAAAGC  | GCGGCCAAAAGTTTACCTCT  | GCGGTACAGAGAGTCATCGT   |
| MmedOR51    | AACTGATCGGAGTGGTGTGG   | GAACGAGCACTGAGAAAACCA | TGTGGAGATCGGTGCATCTT  | ACTCAAAGTTAGACTCGCCAA  |
| MmedOR52    | AGCTAGCGATCGTTACCATGA  | ACAGGTGCGGAAACATTGAG  | CTCAATGTTTCGCGACCTGT  | CCAATGACTGCTAGTTGGCC   |
| MmedOR53    | TGTCAGCGGTAATTTCAAGCT  | TGTCATCCAATAAGCCATGGG | TTACGTGGGCTATGAAAGC   | TCAAGAATGTGCTCGCCATT   |
| MmedGR64f   | TCAGCTTCACTTGGGGAAAGT  | CAGGGCATGTTCGAGGAATG  | GTCTTCTGGGCGACAATGAC  | GCACGACAATTCCTTCCAT    |
| MmedGR6     | TGCATTTAACGAACCTGGC    | GCAAACACTGTGGAAGCTCA  | TGAGCTTCCACAGTGTGTC   | GGAAGTACGAACCAAGCAG    |
| MmedIR8a    | ATGAGAAAAGCCGGTCAAGGA  | TAGCGGTAAAATGTTGCGAGC | GATTTGGCCACCCGTAGAAC  | TCCTTGACCGGCTTTCTCAT   |
| MmedIR25a.1 | ACGGCATTACAGGAGGCTA    | CCTTCCCAATGTCTGTGTGC  | CFTTGTACGCGTCGGAGTTG  | AGCCTCCTGTAATGCCGTA    |
| MmedIR25a.2 | CAAAATCTCTACCAGCGCC    | TCCAGAGACCAAAATCGTCC  | GTGCTGTCTGGGATCCGATA  | CGCCCGAAAATTTTCGGTAT   |
| MmedIR64a   | AACGCGTCGATTGTTGTTGA   | GGTCGTAGGATGCCGGAATA  | GCCCGCAGATTGAGAAATGT  | AATAACGCGGGGCTGAATTC   |
| MmedIR75u   | GCGCGATACTTGGGGTTATC   | ATTCTGCTTGTCTCCCGGT   | TACTGGACCCGATGCTTGTT  | TCACGTTGCTGTAGTCTGT    |
| MmedIR76b   | ATCGAAAGCAGATGTGGCAG   | GAGTGAGTGTGATCCCTGT   | TTGTGTTGTGCCGACTCTTG  | CGTTGTTATGGTCGGAGGTG   |
| β-actin     | CCATCTACGAGGGTTACGCT   | TACCACAGGCTTCCATACCC  | CACTGCCGCATCATCATCAA  | TACCACAGGCTTCCATACCC   |

**Table S3:** MmedOR54~61 sequences

>MmedOR54

RFSVLVENLQKINEGNDGSVNVREIERKMIGDWVDYHNDILDLVKFVKSLFSTAIFVQYAASSLLICSIAYTLSHT  
ETRSMNFAGDFFYLTAQTQIFFQCIADQVTVEFADITNALYNTNWNLSNNVR

>MmedOR55

PGMMFLVCAQINIFKHRFKIMLNTLEVSDHNNNNIADNDCRKINNIFGESVKHHNYIFQLFDNINTVFSTVIFVQY  
SVGSVIFCTSIYHMSDIKITTVEFVSNIFYIGSMLSQIFLLCVSANQVTLEFEDL

>MmedOR56

ALSITQKKINCVIENRTSITHIIDLLQRSPFKLRDHQEELIFSRFDKFARSVFTHYVLAHTGFLSIYSLGRMTLMDPP  
HTLPYNGWFPYNYTRTTKYWITAFQFYAVFSLGVIDLLDLLLLPCIMCYMCGHIHILRYRF

>MmedOR57

VLELNFSLLSILGVWKPRLHWHGMKSIFYHIYRSIVVVINHFLLLSGILDLEFKNVLDLDAFVDNLSLIFAMIVVRQK  
VICMIENRTSISYVLDLGLKGPFFKLRDHQEEVIFKRFTDFIRN

>MmedOR58

ASIAEDIDNISDDYDEGELNITTFCPFDEDIAGTSDCFVTRFKRCKTNHQQLLDTVDQLNDCFSSGMLMQLFASF  
SMIC

>MmedOR59

KSGFFHVFGSVSVWAVCLSYIIEPILMSHRYPTDTAYPFVVKSQVLRITILYLQQIMALFFVAAALTIDFQVATLLWF  
TCVRFEVLGHYFREVSNETELVTCIKKHQKILWYA

>MmedOR60

LLRNYPIYIIAISGNYNDFIEFVPTKIQSSRQCARRSGVCKRLTGDFRFVLSTMEVLKFNFCLLSIMGVWKPRGW  
RGKAIIFYIYRSFVVIILNSLVSGILDLRLKRVQLDTFVDNLSLTLAWVVARQ

>MmedOR61

TITKLYLPWDTKTVAGYWTAWVLQAISRLFGGPVNVACDSLVSVMYRASAQFKILAAARLRGFLLEPANFENSK  
YDYHRVEKHEAKKMAELVKEHLEIIQITKLNDFGFVIFMQYCVSSTVLCVTVFV

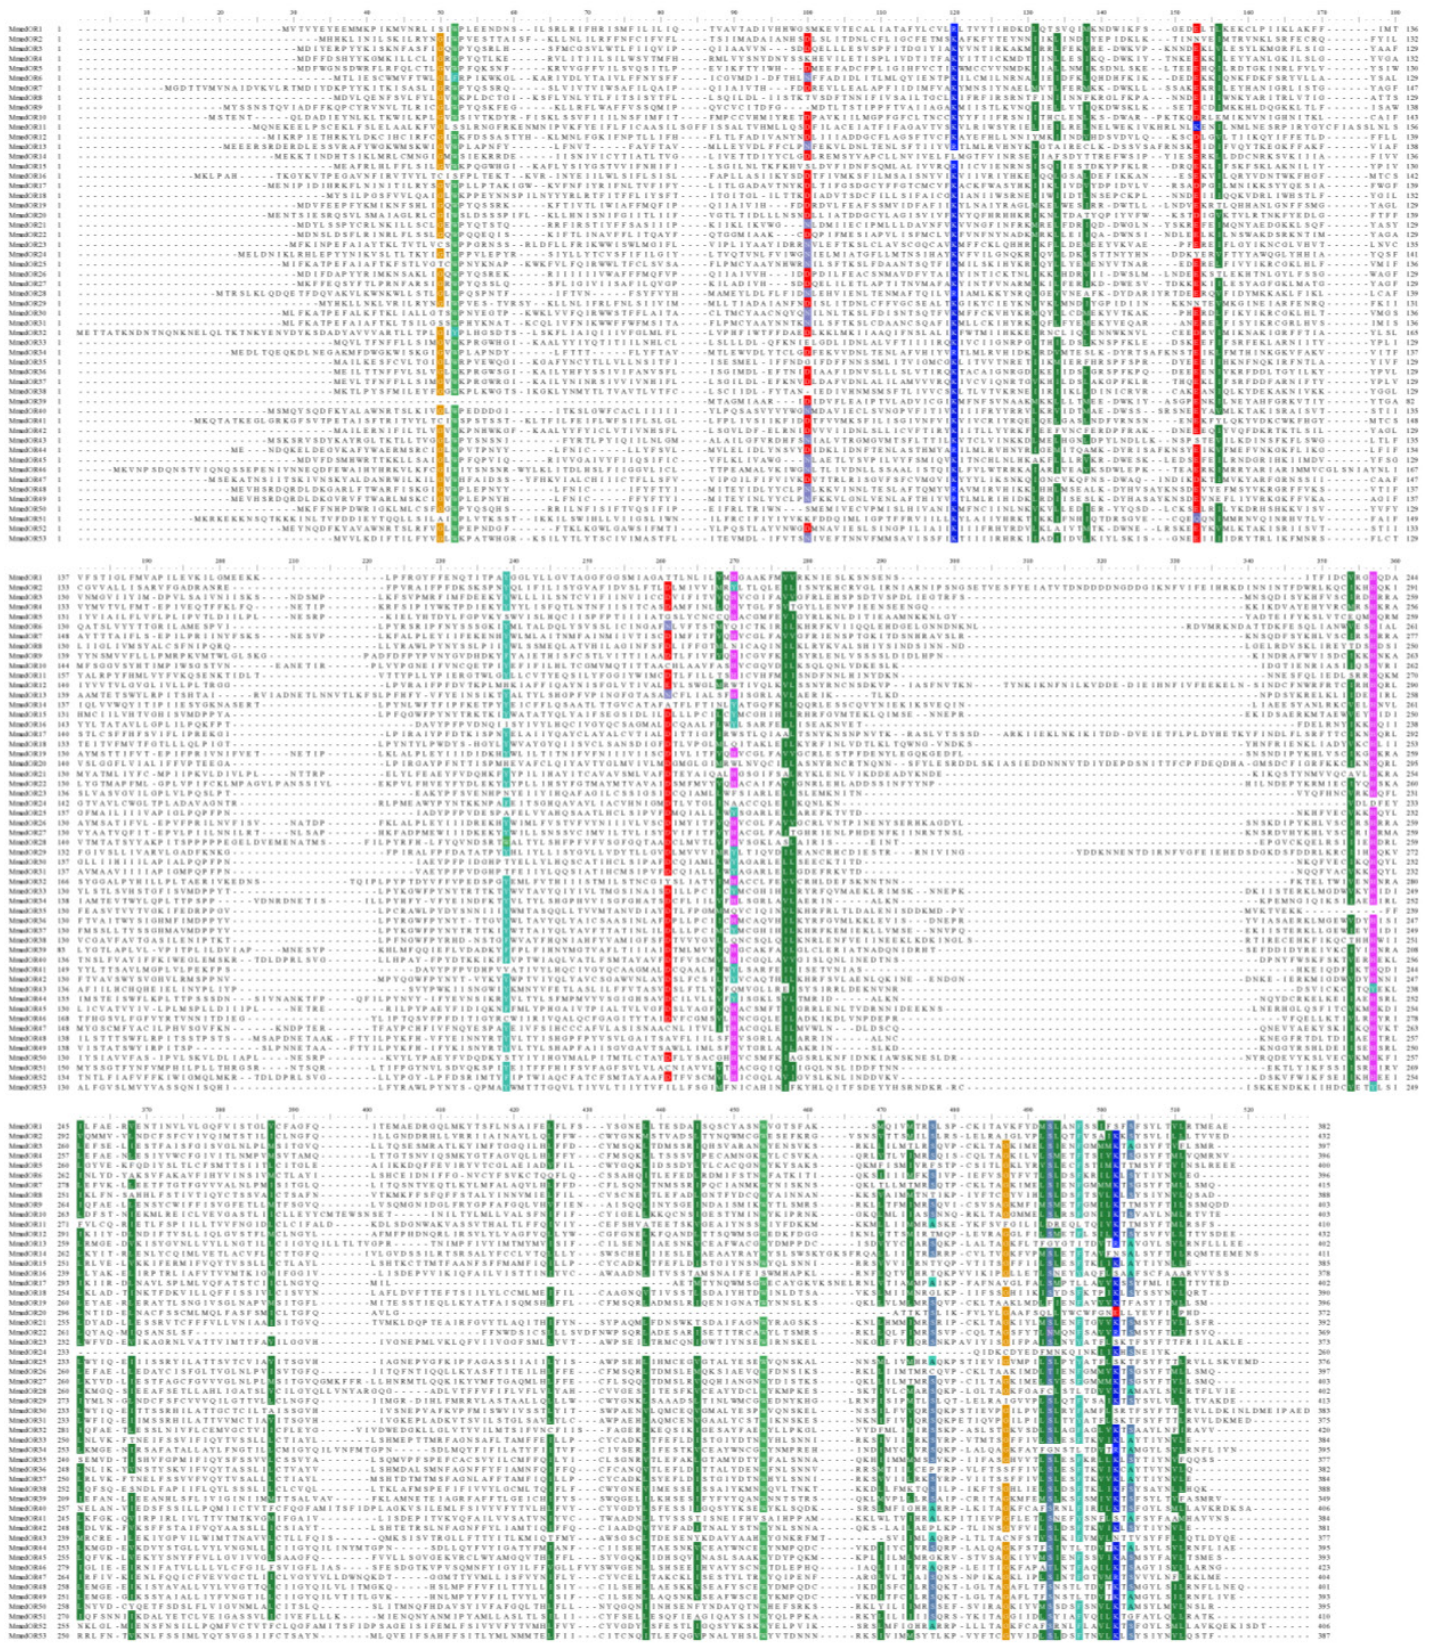

Figure S1. Amino acid sequence alignment of *M. mediator* ORs. Numbers in the right of figure represent the number of the last amino acid in the line.
